# Supplementary material for: Reversibly locked thionucleobase pairs in DNA to study base flipping enzymes
Source: publisher site journal article supplement (doi:10.3762/bjoc.10.239), 2014-10-01
Supplement: Additional file 1 [file 1860-5397-10-239-S1.pdf]

# Supporting Information

for

## Reversibly locked thionucleobase pairs in DNA to study base flipping enzymes

Christine Beuck<sup>1</sup> and Elmar Weinhold<sup>\*2</sup>

Address: <sup>1</sup>The Scripps Research Institute, 10550 North Torrey Pines Road, La Jolla, CA 92037, USA and <sup>2</sup>Institute of Organic Chemistry, RWTH Aachen University, Landoltweg 1, D-52056 Aachen, Germany

Email: Elmar Weinhold - [elmar.weinhold@oc.rwth-aachen.de](mailto:elmar.weinhold@oc.rwth-aachen.de)

\*Corresponding author

### Derivation of equation (1) and Figures S1 and S2

## Derivation of equation (1)

The thermodynamic constants  $K_D^{\text{unlocked}}$ ,  $K_{D,\text{init}}$  and  $K_{\text{flip}}$  for the two-step binding model shown in Figure 5a are defined as follows:

$$K_D^{\text{unlocked}} = \frac{[\text{DNA}] \cdot [\text{E}]}{[\text{E} \cdot \text{DNA}]} = \frac{[\text{DNA}] \cdot [\text{E}]}{[\text{A}] + [\text{B}]} \quad (4)$$

$$K_{D,\text{init}} = \frac{[\text{DNA}] \cdot [\text{E}]}{[\text{A}]} \quad (5)$$

$$K_{\text{flip}} = \frac{[\text{B}]}{[\text{A}]} \quad (6)$$

with  $[\text{DNA}]$ , concentration of unbound DNA;  $[\text{E}]$ , concentration unbound enzyme;  $[\text{E} \cdot \text{DNA}]$  concentration of all enzyme-DNA complexes;  $[\text{A}]$ , concentration of initial complex with innerhelical target base;  $[\text{B}]$ , concentration of complex with flipped target base and  $[\text{E} \cdot \text{DNA}] = [\text{A}] + [\text{B}]$ .

Taking the inverse of eq. (4) and separating the terms:

$$\frac{1}{K_D^{\text{unlocked}}} = \frac{[\text{A}] + [\text{B}]}{[\text{DNA}] \cdot [\text{E}]} = \frac{[\text{A}]}{[\text{DNA}] \cdot [\text{E}]} + \frac{[\text{B}]}{[\text{DNA}] \cdot [\text{E}]} \quad (7)$$

Substituting with eqs. (5) and (6),  $\frac{[\text{A}]}{[\text{DNA}] \cdot [\text{E}]} = \frac{1}{K_{D,\text{init}}}$  and  $\frac{[\text{B}]}{[\text{DNA}] \cdot [\text{E}]} = \frac{K_{\text{flip}}}{K_{D,\text{init}}}$ , gives

$$\frac{1}{K_D^{\text{unlocked}}} = \frac{1}{K_{D,\text{init}}} + \frac{K_{\text{flip}}}{K_{D,\text{init}}} = \frac{1 + K_{\text{flip}}}{K_{D,\text{init}}} \quad (8)$$

Taking the inverse again yields equation (1):

$$K_D^{\text{unlocked}} = \frac{K_{D,\text{init}}}{1 + K_{\text{flip}}} \quad (1)$$

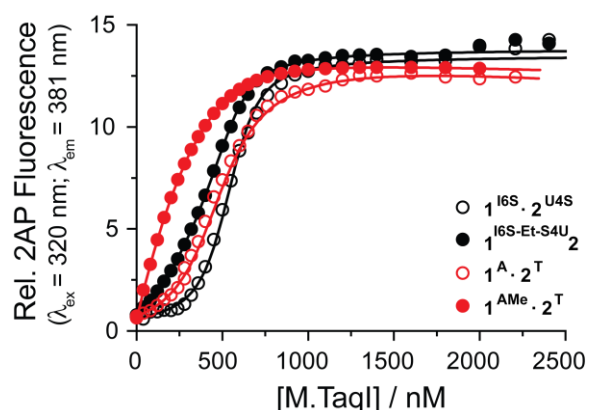

**Figure S1:** Direct comparison of competition binding titrations of DNA with unlocked duplex  $1^{I6S} \cdot 2^{U4S}$  (black open circles), locked duplex  $1^{I6S-Et-S4U}_2$  (black closed circles), A/T substrate duplex  $1^A \cdot 2^T$  (red open circles) and  $A^{Me}/T$  product duplex  $1^{A^{Me}} \cdot 2^T$  (red closed circles) with M.TaqI. Increasing amounts of M.TaqI were added to a mixture of the DNA of interest and a fluorescent DNA with known  $K_D$  that contains the target base analog 2-aminopurine (2AP). A more delayed increase in the 2AP fluorescence indicates tighter binding of the non-fluorescent DNA.

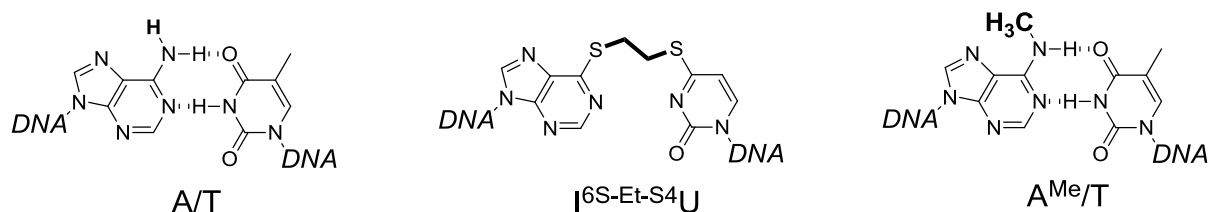

**Figure S2:** Comparison of the substrate A/T (left) and product  $A^{Me}/T$  (right) base pair of adenine-specific DNA MTases, with the cross-linked  $I^{6S-Et-S4U}$  thionucleoside base pair (middle) used to mimic the innerhelical position of the target base in the initial M.TaqI-DNA complex before base flipping. The cross-linked base pair is missing the methyl group and therefore might be a better mimic for the A/T substrate than for the  $A^{Me}/T$  product in DNA.
